# Supplementary material
Source: PubMed Central journal article supplement (PMC391076)

**Supplemental figure 1. Localization of additional heterologous GFP fusion proteins expressed from forespore-specific promoters.** Samples were taken at  $t_3$  after the onset of sporulation from cultures grown in resuspension sporulation media and stained with DAPI (not shown) and Mitotracker Red (red) (overlaid with GFP on the right). GFP (green) images are shown on the left. Arrows in all panels show early sporangia with GFP enriched at the septum. **(A)** AR4 (*amyE::P<sub>spoIIQ</sub>malF<sub>12</sub>-gfp $\Omega$ cat*). **(B)** AR90 (*amyE::P<sub>csfB</sub>malF<sub>12</sub>-gfp $\Omega$ cat*). **(C)** AR78 (*amyE::P<sub>spoIIIR</sub>malF<sub>12</sub>-gfp $\Omega$ cat*). **(D)** AR6 (*amyE::P<sub>spoIIQ</sub>gfp $\Omega$ cat*). **(E)** AR92 (*amyE::P<sub>csfB</sub>gfp $\Omega$ cat*). **(F)** AR77 (*amyE::P<sub>spoIIIR</sub>gfp $\Omega$ cat*). **(G)** AR111 (*amyE::P<sub>spoIIQ</sub>motA<sub>12</sub>-gfp $\Omega$ cat*). **(H)** AR104 (*amyE::P<sub>spoIIQ</sub>secY<sub>12</sub>-gfp $\Omega$ cat*). **(I)** AR29 (*amyE::P<sub>spoIIQ</sub>lacY<sub>12</sub>-gfp $\Omega$ cat*). **(J)** AR31 (*amyE::P<sub>spoIIQ</sub>araP<sub>12</sub>-gfp $\Omega$ cat*). Bar = 2  $\mu$ m.

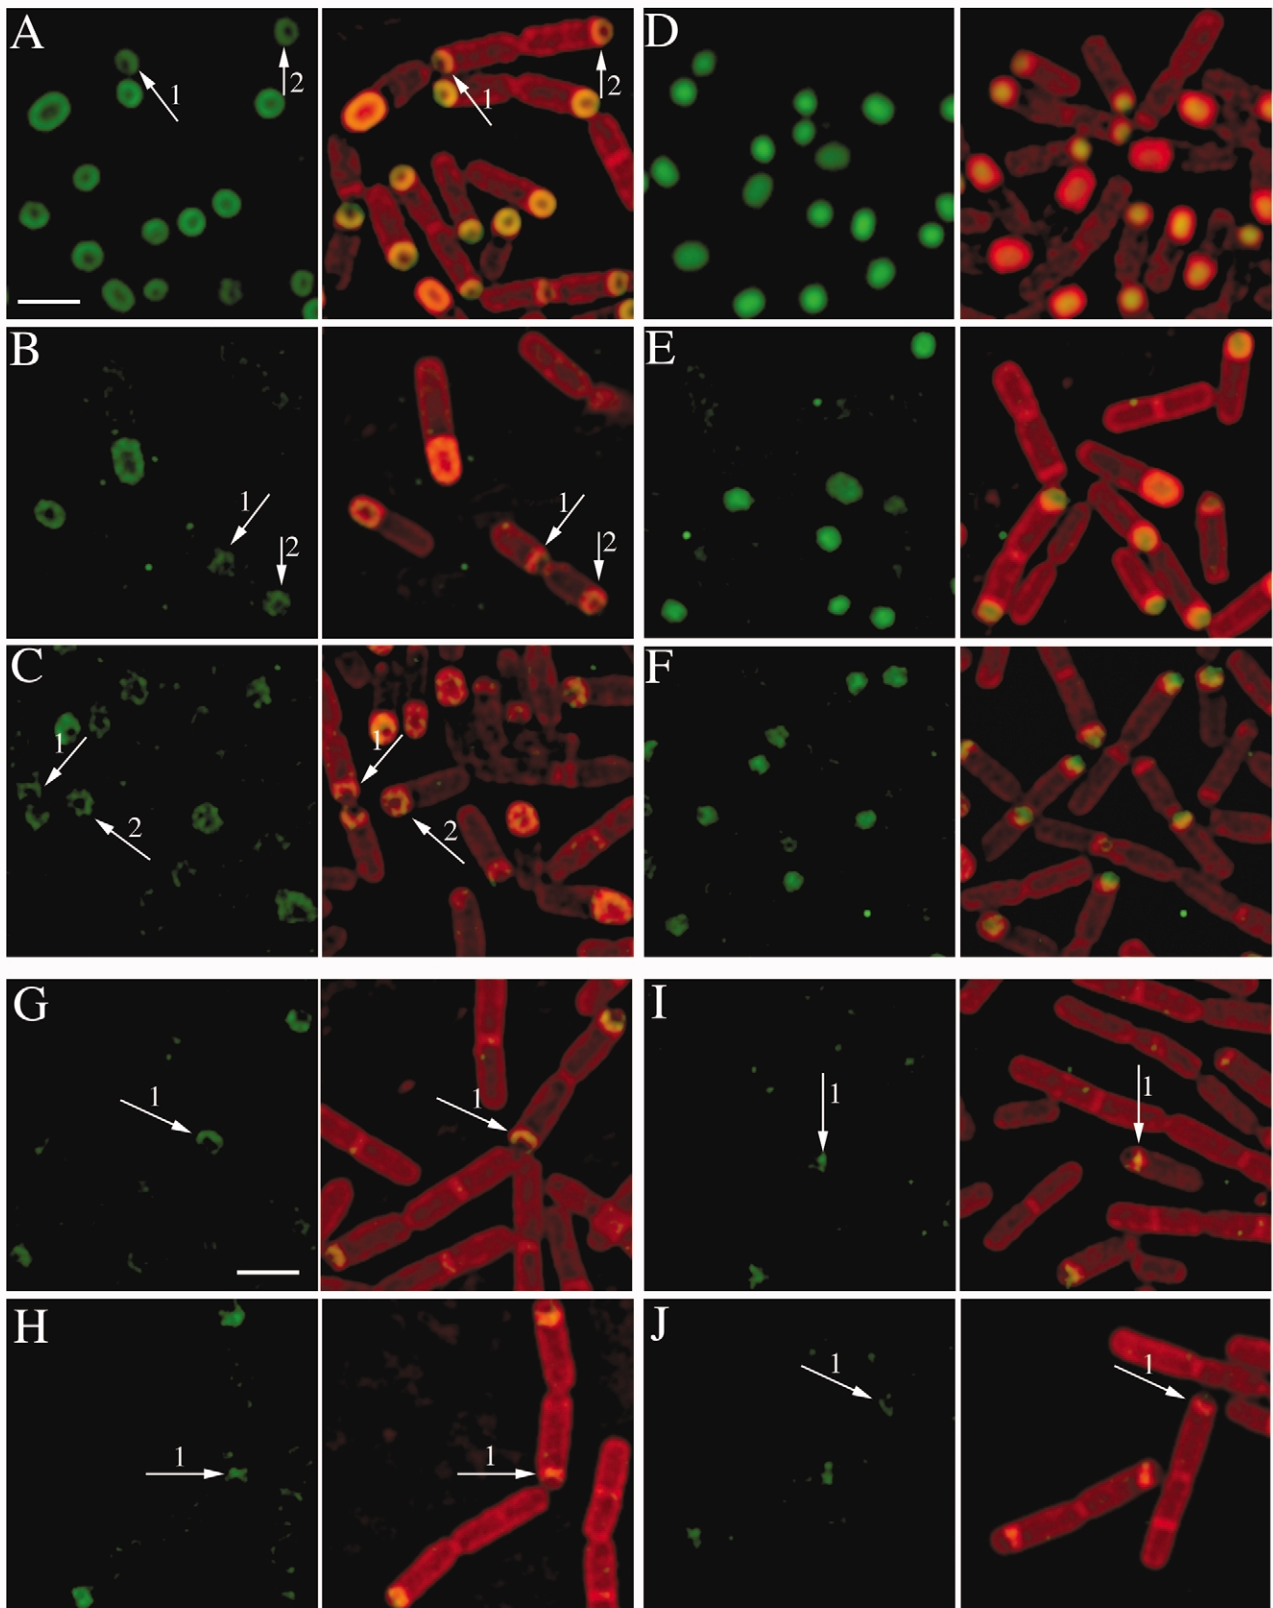

Supplement: 7600171s1.pdf [file 7600171s1.pdf]
