# Supplementary material
Source: PubMed Central journal article supplement (PMC391076)

**Supplemental figure 2. Different optical sections showing localization of GFP-SpoIIQ.** Top panel represents the medial focal plane. Middle panel represents an increase of 0.2 $\mu$ m above the medial focal plane. Lower panel represents an increase of 0.4 $\mu$ m above the medial focal plane. Many sporangia display hoops of GFP fluorescence. Bar = 2 $\mu$ m.

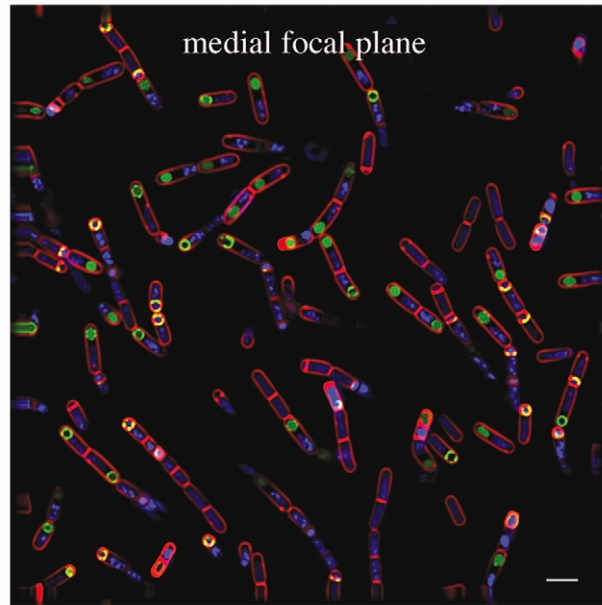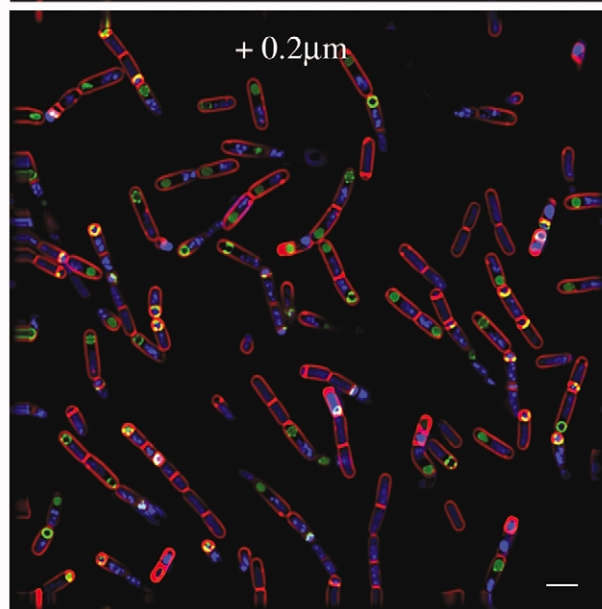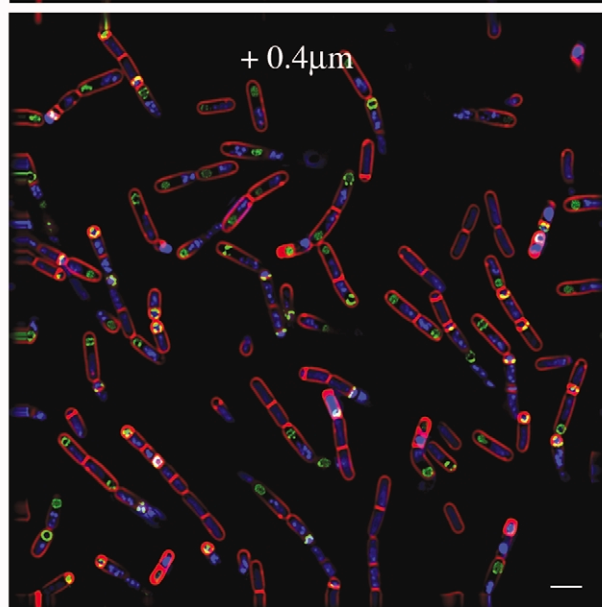

Supplement: 7600171s2.pdf [file 7600171s2.pdf]
