# Supplementary material
Source: PubMed Central journal article supplement (PMC391076)
Supplement: 7600171s3.pdf [file 7600171s3.pdf]

**Supplemental figure 3. Quantitation of GFP-SpoIIQ and MalF-GFP in various *spo* backgrounds.** Scoring of sporangia with GFP-SpoIIQ or MalF-GFP at  $t_3$ . GFP is shown in black with cell outlines in grey. GFP localization and membrane morphology are as follows: **(A)** GFP lining flat, polar septa; **(B)** GFP tracking with engulfing membrane (\* refers to MalF-GFP localization enriched at the septum, but also diffused to the pole); **(C)** rings of GFP just prior to membrane fusion (in mutants lacking SpoIIP, M or D, no engulfing membranes exist and MalF-GFP is freely diffusible and appear as rings) (in strains containing a *spoIIGB* mutation, no  $\sigma^E$  is made and cells become disporic); **(D)** GFP localized to membrane as well as punctate in cells just prior to membrane fusion; **(E)** bulge mutants with GFP trapped in the septum; **(F)** bulge mutants with GFP freely diffusible throughout the forespore membrane and **(G)** collapsed forespores with GFP trapped inside. Numbers refer to the percentage of sporangia in each class depicted above. Bolded numbers refer to the predominant class of sporangia.

| Strain background:                       |   | wild type                                                                           |           | <i>spoIIP</i> |           | <i>spoIID</i> |           | <i>spoIIM</i> |           | <i>spoIIGB</i> |           |           |
|------------------------------------------|---|-------------------------------------------------------------------------------------|-----------|---------------|-----------|---------------|-----------|---------------|-----------|----------------|-----------|-----------|
| GFP fusion to:                           |   | SpoIIQ                                                                              | MalF      | SpoIIQ        | MalF      | SpoIIQ        | MalF      | SpoIIQ        | MalF      | SpoIIQ         | MalF      |           |
| GFP localization and membrane morphology | A |    | 23        | 28            | 27        | 4             | 31        | 3             | 10        | 8              | 3         | 2         |
|                                          | B |    | 8         | *16           | 4         |               | 11        |               | 11        |                |           |           |
|                                          | C |    | 8         | <b>56</b>     |           | 23            |           | 34            |           | 10             | <b>71</b> | <b>61</b> |
|                                          | D |   | <b>52</b> |               |           |               |           |               |           |                |           |           |
|                                          | E |  |           |               | <b>69</b> |               | <b>58</b> |               | <b>79</b> |                |           |           |
|                                          | F |  |           |               |           | <b>72</b>     |           | <b>63</b>     |           | <b>83</b>      |           |           |
|                                          | G |  |           |               |           |               |           |               |           |                | 26        | 37        |
| Total sporangia scored                   |   | 126                                                                                 | 194       | 320           | 370       | 112           | 189       | 177           | 176       | 355            | 397       |           |
